# Supplementary material for: Petri net-based approach to modeling and analysis of selected aspects of the molecular regulation of angiogenesis
Source: PubMed Central journal article supplement (PMC5333880; doi:10.1371/journal.pone.0173020), 2017-03-02
Supplement: pone.0173020.s001.pdf [file pone.0173020.s001.pdf]

### Script 1:

#### parameters:

**distance\_metric:** *binary, canberra, euclidean, manhattan, maximum, minkowski*  
**joining\_method:** *average, centroid, complete, mcquitty, median, single, ward.D*  
**path:** path for invariants file  
**invariants\_input\_file:** name of invariants file  
**number\_of\_clusters:** upper range for cluster computation, minimum set for 2, cannot exceed invariants number

#### library required:

cluster

```
veni1 <- function(distance_metric,joining_method,path,invariants_input_file,number_of_clusters)
{
  file_path = paste(path, invariants_input_file, sep = "")
  plik=read.csv(file=file_path, sep=";")
  plik=plik[,-1]
  distance=dist(plik,method=distance_metric)
  clustersMatrix=hclust(distance,method=joining_method)
  file_path = paste(path,joining_method,"_",distance_metric,"_", "dendrogram.pdf",sep="")
  pdf(file_path, width=170, height=170, bg = "white")
  plot(clustersMatrix,hang=-1)
  dev.off()
  file_path = paste(path,joining_method,"_",distance_metric,"_", "clusters",".pdf",sep="")
  pdf(file_path, width=10, height=200, bg = "white")
  file_path = paste(path,joining_method,"_",distance_metric,"_", "clusters",".txt",sep="")

  for(i in 2:number_of_clusters)
  {
    sil <- silhouette(cutree(clustersMatrix,i),distance)
    sortSilhouette(sil)
    plot(silhouette(cutree(clustersMatrix,i),distance), cex.names = 0.5)
    #cat(paste(summary(sil)), file_path, append=TRUE)
    print(summary(sil))
  }
  dev.off()
}
```

---

### Script 2:

#### parameters:

**distance\_metric:** *pearson, correlation*  
**joining\_method:** *average, centroid, complete, mcquitty, median, single, ward*  
**path:** path for invariants file  
**invariants\_input\_file:** name of invariants file  
**number\_of\_clusters:** upper range for cluster computation, minimum set for 2, cannot exceed invariants number

#### library required:

cluster  
amap

```

veni2 <- function(distance_metric,joining_method,path,invariants_input_file,number_of_clusters)
{
  file_path = paste(path, invariants_input_file, sep = "")
  plik=read.csv(file=file_path, sep=";")
  plik=plik[,-1]
  distance=Dist(plik,method=distance_metric)
  clustersMatrix=hcluster(plik,method=distance_metric,link=joining_method)
  file_path = paste(path,joining_method,"_",distance_metric,"_", "dendrogram.pdf",sep="")
  pdf(file_path, width=170, height=170, bg = "white")
  plot(clustersMatrix,hang=-1)
  dev.off()
  file_path = paste(path,joining_method,"_",distance_metric,"_", "clusters",".pdf",sep="")
  pdf(file_path, width=10, height=200, bg = "white")
  for(i in 2:number_of_clusters)
  {
    sil <- silhouette(cutree(clustersMatrix,i),distance)
    sortSilhouette(sil)
    plot(silhouette(cutree(clustersMatrix,i),distance))
    print(summary(sil))
  }
  dev.off()
}

```

---

**Example of invariants file in the desired csv format:**

**first line:** names of transition

**second and next:** t-invariants as a vector, in each line first number is the index of the t-invariants counting from 1.

;0.HIF\_1\_alpha\_SH\_and\_HIF\_1\_beta\_dimerization;1.running\_genes\_responsible\_for\_cell\_adaptation\_to\_hypoxia;2.binding\_VEGR\_and\_VEGFR\_2;3.VEGFR2\_expression;4.starting\_a\_tyrosine\_kinase\_signalling\_cascade;5.GLUT1\_induced\_processes;6.binding\_EPO\_and\_EPOR;7.constitutively\_expression\_of\_HIF\_1\_beta;8.hydroxylation\_of\_proline;9.conservative\_hydrolysis\_of\_asparagine;10.binding\_HIF\_1\_OH\_OH\_and\_VHL\_VBP\_1;11.no\_HIF\_1\_alpha\_HIF\_1\_beta\_dimerization;12.low\_concentration\_of\_oxygen\_in\_the\_organism;13.HIF\_1\_hydroxylases\_inactivation;14.CBP\_p300\_synthesis;15.no\_degradation\_of\_HIF\_1\_alpha;16.normalization\_of\_oxygen\_status\_in\_the\_organism;17.VHL\_synthesis;18.NO\_synthesis;19.MMPS\_pericytes\_recruitment\_and\_invasion;20.PDGF\_AB\_and\_BB\_endothelial\_secretion\_by\_pericytes;21.FGFRs\_activation;22.PDGFRs\_upregulation;23.binding\_PDGFBAB\_and\_BB\_with\_PDGFRs\_activated;24.removal\_of\_ligands;25.pericytes\_and\_smooth\_muscles\_cells\_migration;26.strong\_endothelial\_activation;27.endothelial\_proliferation\_and\_migration;28.binding;29.new\_stabilized\_vessels;30.eNOS\_activation\_by\_interraction\_with\_CaM\_Ca\_complex;31.cleavage;32.caveolin\_usage;33.processes\_increasing\_shear\_stress;34.CaM\_caveolin\_1\_binding;35.caveolin\_1\_synthesized\_in\_ER;36.binding\_angiopietins\_with\_tie\_receptor\_on\_endothelial\_cells;37.constitutively\_expression\_of\_angiopietin\_1;38.Tie\_expression;39.angiopietin\_expression;40.vessels\_remodelling;41.S1P\_and\_EDG1\_binding;42.S1P\_synthesis;43.EDG\_1\_synthesis;44.ECM\_enhancing\_and\_increasing\_synthesis\_and\_release\_of\_HB\_EGF;45.binding\_HB\_EGF\_with\_EGFR;46.TGFbeta1\_TGFbetaR1I\_binding;47.activin\_like\_kinase\_5\_ALK\_5\_activation;48.TGFbetaR1I\_synthesis;49.TGFbeta1\_synthesis;50.complex\_binding\_to\_HREs\_hypoxia\_responsive\_elements;51.synthesis\_factors\_that\_variously\_stimulate\_vessels\_permability;52.synthesis\_factors\_that\_variously\_stimulate\_proliferation\_survival\_bFGF;53.synthesis\_factors\_that\_variously\_stimulate\_migration\_MMPS;54.increase\_in\_intracellular\_Ca;55.CaM\_EPOR\_binding;56.upregulation\_of\_EPOR\_signalling\_pathways;57.CaM\_binds\_Ca;58.CaM\_synthesis;59.HIF\_2\_alpha\_influence\_on\_EPO;60.Sirtuin\_1\_influence\_on\_HIF\_2\_alpha;61.Sirtuin\_1\_synthesis;62.Fe\_2\_increasing;63.HIF\_1\_alpha\_asparagine\_hydroxylases\_activation;64.HIF\_1\_al
