# Supplementary material for: Petri net-based approach to modeling and analysis of selected aspects of the molecular regulation of angiogenesis
Source: PubMed Central journal article supplement (PMC5333880; doi:10.1371/journal.pone.0173020), 2017-03-02
Supplement: pone.0173020.s004.pdf [file pone.0173020.s004.pdf]

**S3 Table. Knockout results for all transitions when transitions  $t_{12}$ ,  $t_{18}$  and MCT-set  $m_2$  have been disabled**

| Transition | Transition status | Reference set | Knockout set | Difference |
|------------|-------------------|---------------|--------------|------------|
| $t_0$      | OFFLINE (MCT2)    | 14.98%        | 0.00%        | disabled   |
| $t_1$      | OFFLINE (MCT2)    | 12.62%        | 0.00%        | disabled   |
| $t_2$      | OFFLINE (MCT2)    | 12.62%        | 0.00%        | disabled   |
| $t_3$      | OFFLINE (MCT2)    | 50.00%        | 0.00%        | disabled   |
| $t_4$      | OFFLINE (MCT2)    | 12.62%        | 0.00%        | disabled   |
| $t_5$      | OFFLINE (MCT2)    | 12.48%        | 0.00%        | disabled   |
| $t_6$      | KNOCKOUT          | 2.35%         | 0.00%        | disabled   |
| $t_7$      | OFFLINE (MCT2)    | 14.99%        | 0.00%        | disabled   |
| $t_8$      | ACTIVE            | 34.71%        | 41.40%       | 6.69%      |
| $t_9$      | ACTIVE            | 21.24%        | 24.78%       | 3.55%      |
| $t_{10}$   | ACTIVE            | 34.69%        | 41.37%       | 6.67%      |
| $t_{11}$   | ACTIVE            | 21.23%        | 24.78%       | 3.54%      |
| $t_{12}$   | OFFLINE           | 50.00%        | 0.00%        | disabled   |
| $t_{13}$   | KNOCKOUT          | 22.80%        | 0.00%        | disabled   |
| $t_{14}$   | OFFLINE (MCT2)    | 50.01%        | 0.00%        | disabled   |
| $t_{15}$   | KNOCKOUT          | 13.46%        | 0.00%        | disabled   |
| $t_{16}$   | KNOCKOUT          | 7.49%         | 0.00%        | disabled   |
| $t_{17}$   | ACTIVE            | 49.99%        | 49.99%       | 0.00%      |
| $t_{18}$   | OFFLINE           | 16.39%        | 0.00%        | disabled   |
| $t_{19}$   | KNOCKOUT          | 4.20%         | 0.00%        | disabled   |
| $t_{20}$   | OFFLINE (MCT2)    | 50.01%        | 0.00%        | disabled   |
| $t_{21}$   | KNOCKOUT          | 4.21%         | 0.00%        | disabled   |
| $t_{22}$   | KNOCKOUT          | 4.20%         | 0.00%        | disabled   |
| $t_{23}$   | KNOCKOUT          | 4.20%         | 0.00%        | disabled   |
| $t_{24}$   | KNOCKOUT          | 4.20%         | 0.00%        | disabled   |
| $t_{25}$   | KNOCKOUT          | 4.09%         | 0.00%        | disabled   |
| $t_{26}$   | KNOCKOUT          | 22.81%        | 0.00%        | disabled   |
| $t_{27}$   | ACTIVE            | 13.48%        | 16.67%       | 3.19%      |
| $t_{28}$   | KNOCKOUT          | 4.07%         | 0.00%        | disabled   |
| $t_{29}$   | ACTIVE            | 16.42%        | 17.07%       | 0.65%      |
| $t_{30}$   | ACTIVE            | 12.19%        | 1.79%        | -10.40%    |
| $t_{31}$   | ACTIVE            | 20.94%        | 7.63%        | -13.31%    |
| $t_{32}$   | ACTIVE            | 43.53%        | 44.11%       | 0.58%      |
| $t_{33}$   | ACTIVE            | 50.02%        | 50.03%       | 0.00%      |
| $t_{34}$   | ACTIVE            | 27.37%        | 13.48%       | -13.89%    |
| $t_{35}$   | ACTIVE            | 50.00%        | 50.00%       | 0.00%      |
| $t_{36}$   | ACTIVE            | 12.35%        | 7.63%        | -4.72%     |
| $t_{37}$   | ACTIVE            | 21.00%        | 7.65%        | -13.35%    |
| $t_{38}$   | ACTIVE            | 49.99%        | 49.99%       | 0.00%      |
| $t_{39}$   | ACTIVE            | 24.71%        | 24.71%       | 0.00%      |
| $t_{40}$   | ACTIVE            | 12.36%        | 17.07%       | 4.71%      |
| $t_{41}$   | ACTIVE            | 49.27%        | 49.27%       | -0.01%     |
| $t_{42}$   | ACTIVE            | 49.99%        | 50.00%       | 0.01%      |
| $t_{43}$   | ACTIVE            | 50.00%        | 50.00%       | 0.00%      |
| $t_{44}$   | ACTIVE            | 8.28%         | 7.63%        | -0.65%     |
| $t_{45}$   | KNOCKOUT          | 4.20%         | 0.00%        | disabled   |
| $t_{46}$   | ACTIVE            | 49.43%        | 49.27%       | -0.16%     |
| $t_{47}$   | ACTIVE            | 49.04%        | 48.92%       | -0.12%     |
| $t_{48}$   | ACTIVE            | 50.00%        | 50.01%       | 0.01%      |
| $t_{49}$   | ACTIVE            | 49.99%        | 50.00%       | 0.01%      |
| $t_{50}$   | OFFLINE (MCT2)    | 14.98%        | 0.00%        | disabled   |
| $t_{51}$   | KNOCKOUT          | 4.20%         | 0.00%        | disabled   |
| $t_{52}$   | KNOCKOUT          | 4.21%         | 0.00%        | disabled   |
| $t_{53}$   | KNOCKOUT          | 4.20%         | 0.00%        | disabled   |
| $t_{54}$   | ACTIVE            | 20.99%        | 7.65%        | -13.34%    |
| $t_{55}$   | KNOCKOUT          | 2.35%         | 0.00%        | disabled   |
| $t_{56}$   | KNOCKOUT          | 2.35%         | 0.00%        | disabled   |
| $t_{57}$   | ACTIVE            | 20.99%        | 7.65%        | -13.34%    |
| $t_{58}$   | ACTIVE            | 50.01%        | 50.01%       | 0.00%      |
| $t_{59}$   | ACTIVE            | 24.71%        | 24.73%       | 0.02%      |

| <b>Transition</b> | <b>Transition status</b> | <b>Reference set</b> | <b>Knockout set</b> | <b>Difference</b> |
|-------------------|--------------------------|----------------------|---------------------|-------------------|
| $t_{60}$          | ACTIVE                   | 49.43%               | 49.45%              | 0.01%             |
| $t_{61}$          | ACTIVE                   | 50.00%               | 50.02%              | 0.02%             |
| $t_{62}$          | ACTIVE                   | 50.00%               | 50.00%              | 0.00%             |
| $t_{63}$          | ACTIVE                   | 21.24%               | 24.79%              | 3.55%             |
| $t_{64}$          | ACTIVE                   | 21.24%               | 24.78%              | 3.54%             |
| $t_{65}$          | ACTIVE                   | 50.00%               | 50.01%              | 0.01%             |
| $t_{66}$          | ACTIVE                   | 34.68%               | 41.34%              | 6.66%             |
| $t_{67}$          | ACTIVE                   | 50.00%               | 50.02%              | 0.01%             |
| $t_{68}$          | OFFLINE (MCT2)           | 50.01%               | 0.00%               | disabled          |
| $t_{69}$          | ACTIVE                   | 13.48%               | 16.67%              | 3.19%             |
| $t_{70}$          | ACTIVE                   | 13.48%               | 16.65%              | 3.16%             |
| $t_{71}$          | ACTIVE                   | 50.00%               | 49.99%              | -0.01%            |
| $t_{72}$          | KNOCKOUT                 | 2.35%                | 0.00%               | disabled          |
| $t_{73}$          | ACTIVE                   | 50.00%               | 50.01%              | 0.00%             |
